# Supplementary material for: Charge-transport in tin-iodide perovskite CH3NH3SnI3: origin of high conductivity
Source: Royal Society of Chemistry journal article supplement (doi:10.1039/c0dt01601b), 2011-01-01
Supplement: c0dt01601b.pdf [file c0dt01601b.pdf]

Electronic Supplementary Information

**Charge-Transport in Tin-Iodide Perovskite  $\text{CH}_3\text{NH}_3\text{SnI}_3$ :**

**Origin of High Conductivity†**

**Yukari Takahashi, Rena Obara, Zheng-Zhong Lin, Yukihiro Takahashi, Toshio**

**Naito, Tamotsu Inabe,\* Shoji Ishibashi, and Kiyoyuki Terakura**

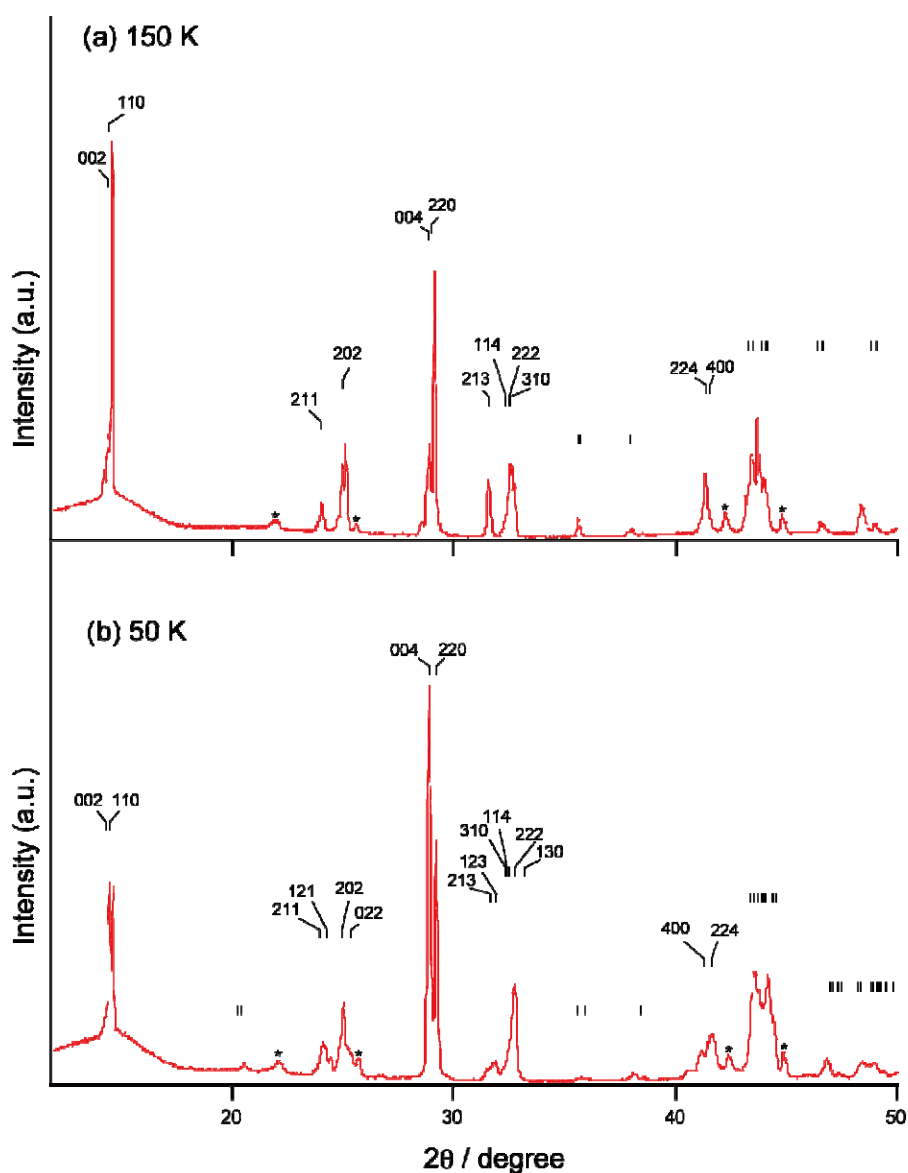

**Figure S1.** Powder diffraction of  $\text{CH}_3\text{NH}_3\text{SnI}_3$  at 150 K (a) and 50 K (b) (Cu- $\text{K}\alpha$ ). Peaks from contamination (surface degradation) and the sample holder are marked by asterisks.

Indexing of (a): tetragonal,  $I4/mcm$ , with  $a = 8.702$ , and  $c = 12.383$  Å.

Indexing of (b): orthorhombic with  $a = 8.745$ ,  $b = 8.526$ , and  $c = 12.353$  Å.

Trace of the cubic phase coexists in (a), probably due to stress or temperature inhomogeneity induced by embedding sample in grease.
